# Supplementary material
Source: Springer Nature journal article supplement (https://www.springermedizin.de/resource/supplementary/13098_2013_307_MOESM2_ESM.pdf/9671048)

**A: Insulinogenic Index**  
(pmol/ mmol)

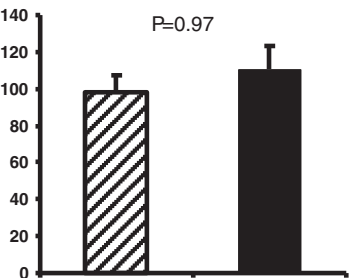

**B: C-Peptide-genic Index**  
(pmol/ mmol)

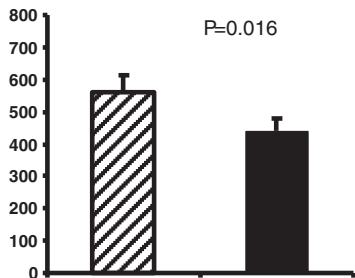

**C: Disposition Index x 1000**  
(pmol/mmol/m2/min)

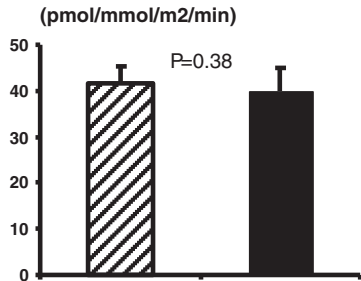

**D: Adaptation Index x 10000**  
(pmol/mmol/m2/min)

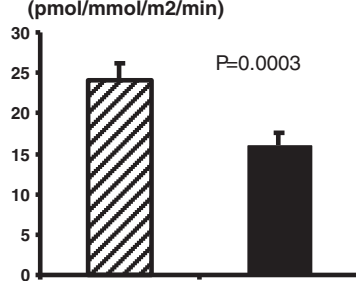

Supplement: MOESM2 [file 9671048]
